# Supplementary material
Source: PubMed Central journal article supplement (PMC10070471)

Fig. 1A

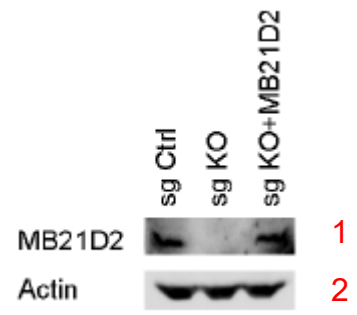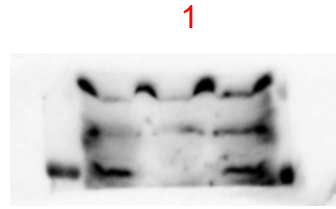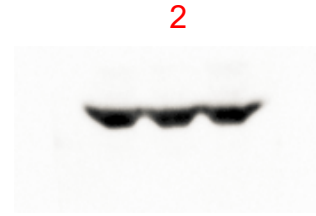

Fig. 1E

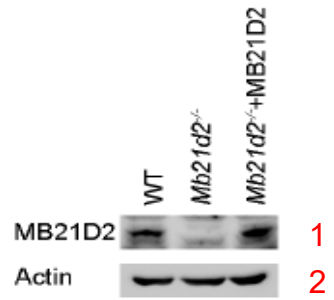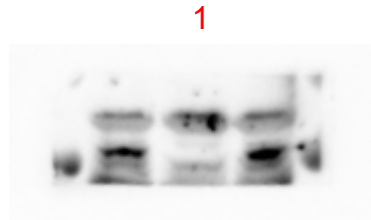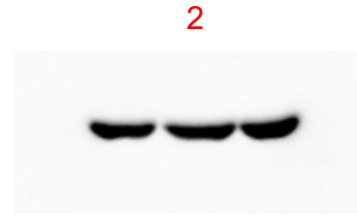

Fig. 2A ISD

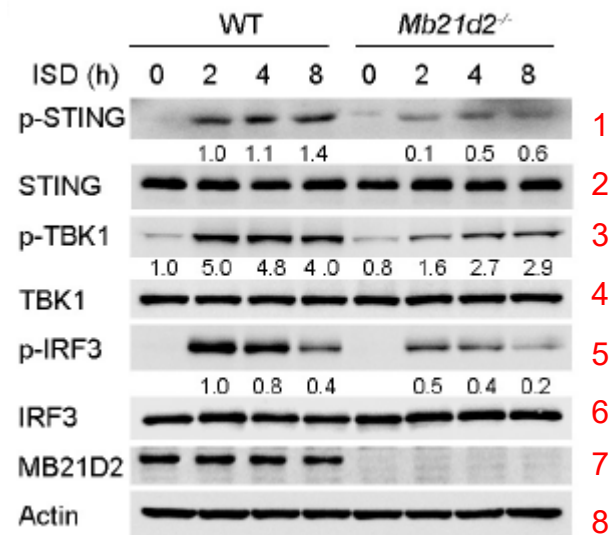

1

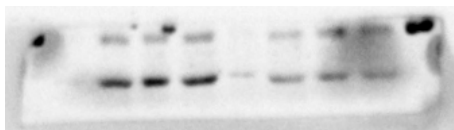

2

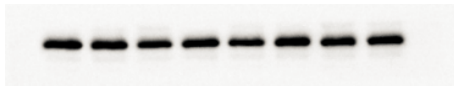

3

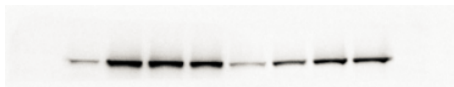

4

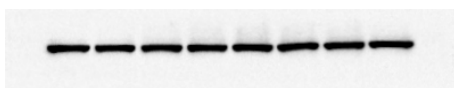

5

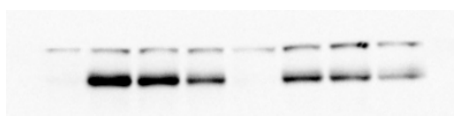

6

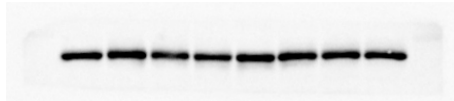

7

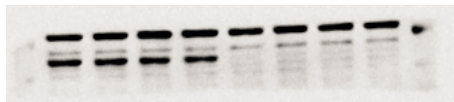

8

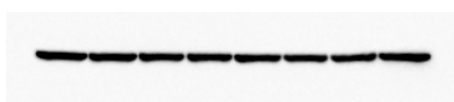

Fig. 2A HSV-1

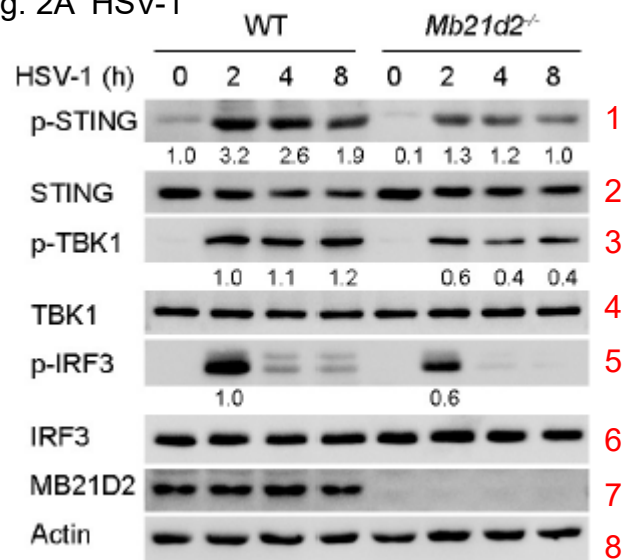

1

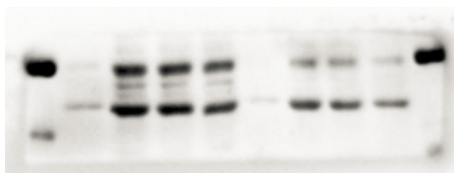

2

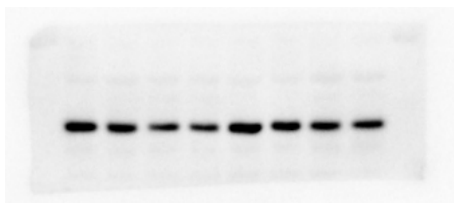

3

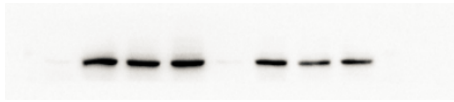

4

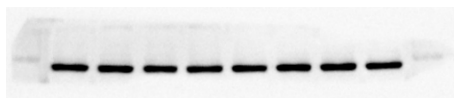

5

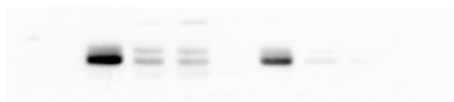

6

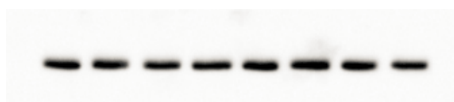

7

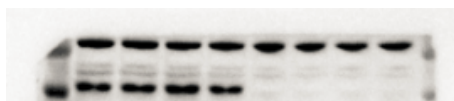

8

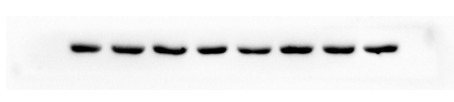

Fig. 2A cGAMP

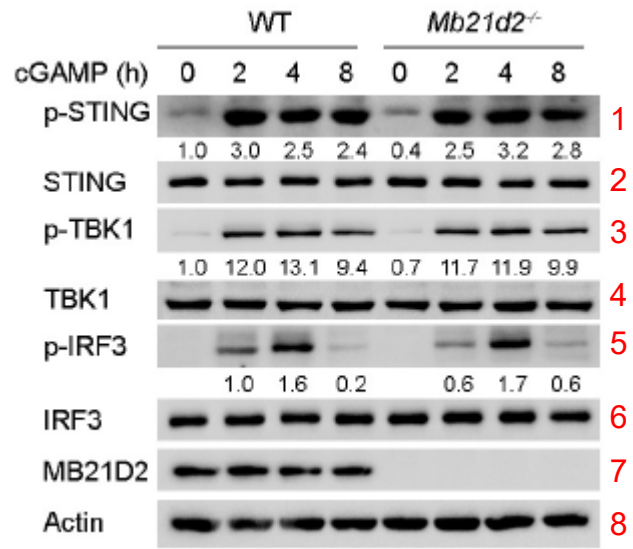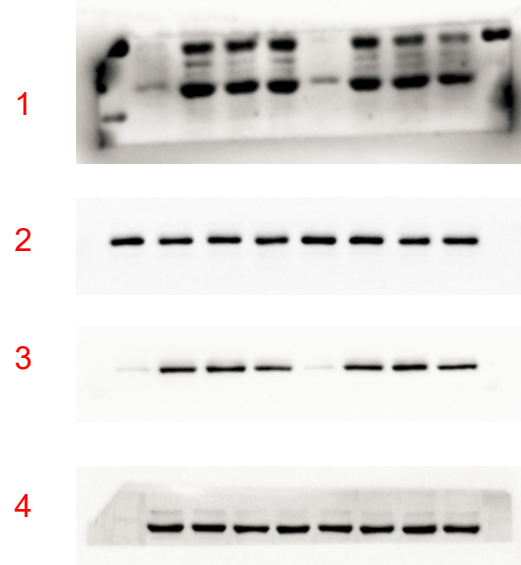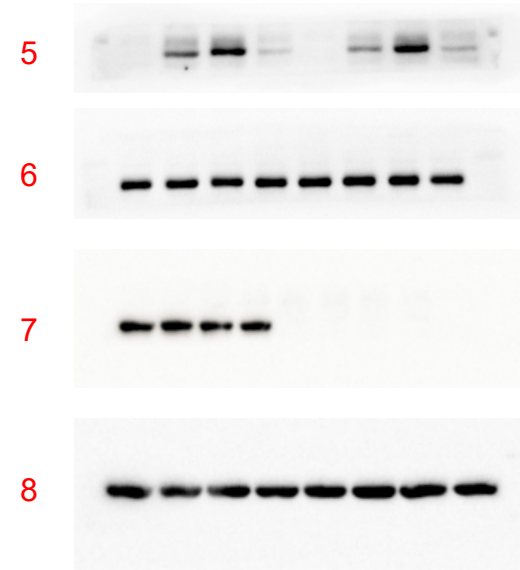

Fig. 2B

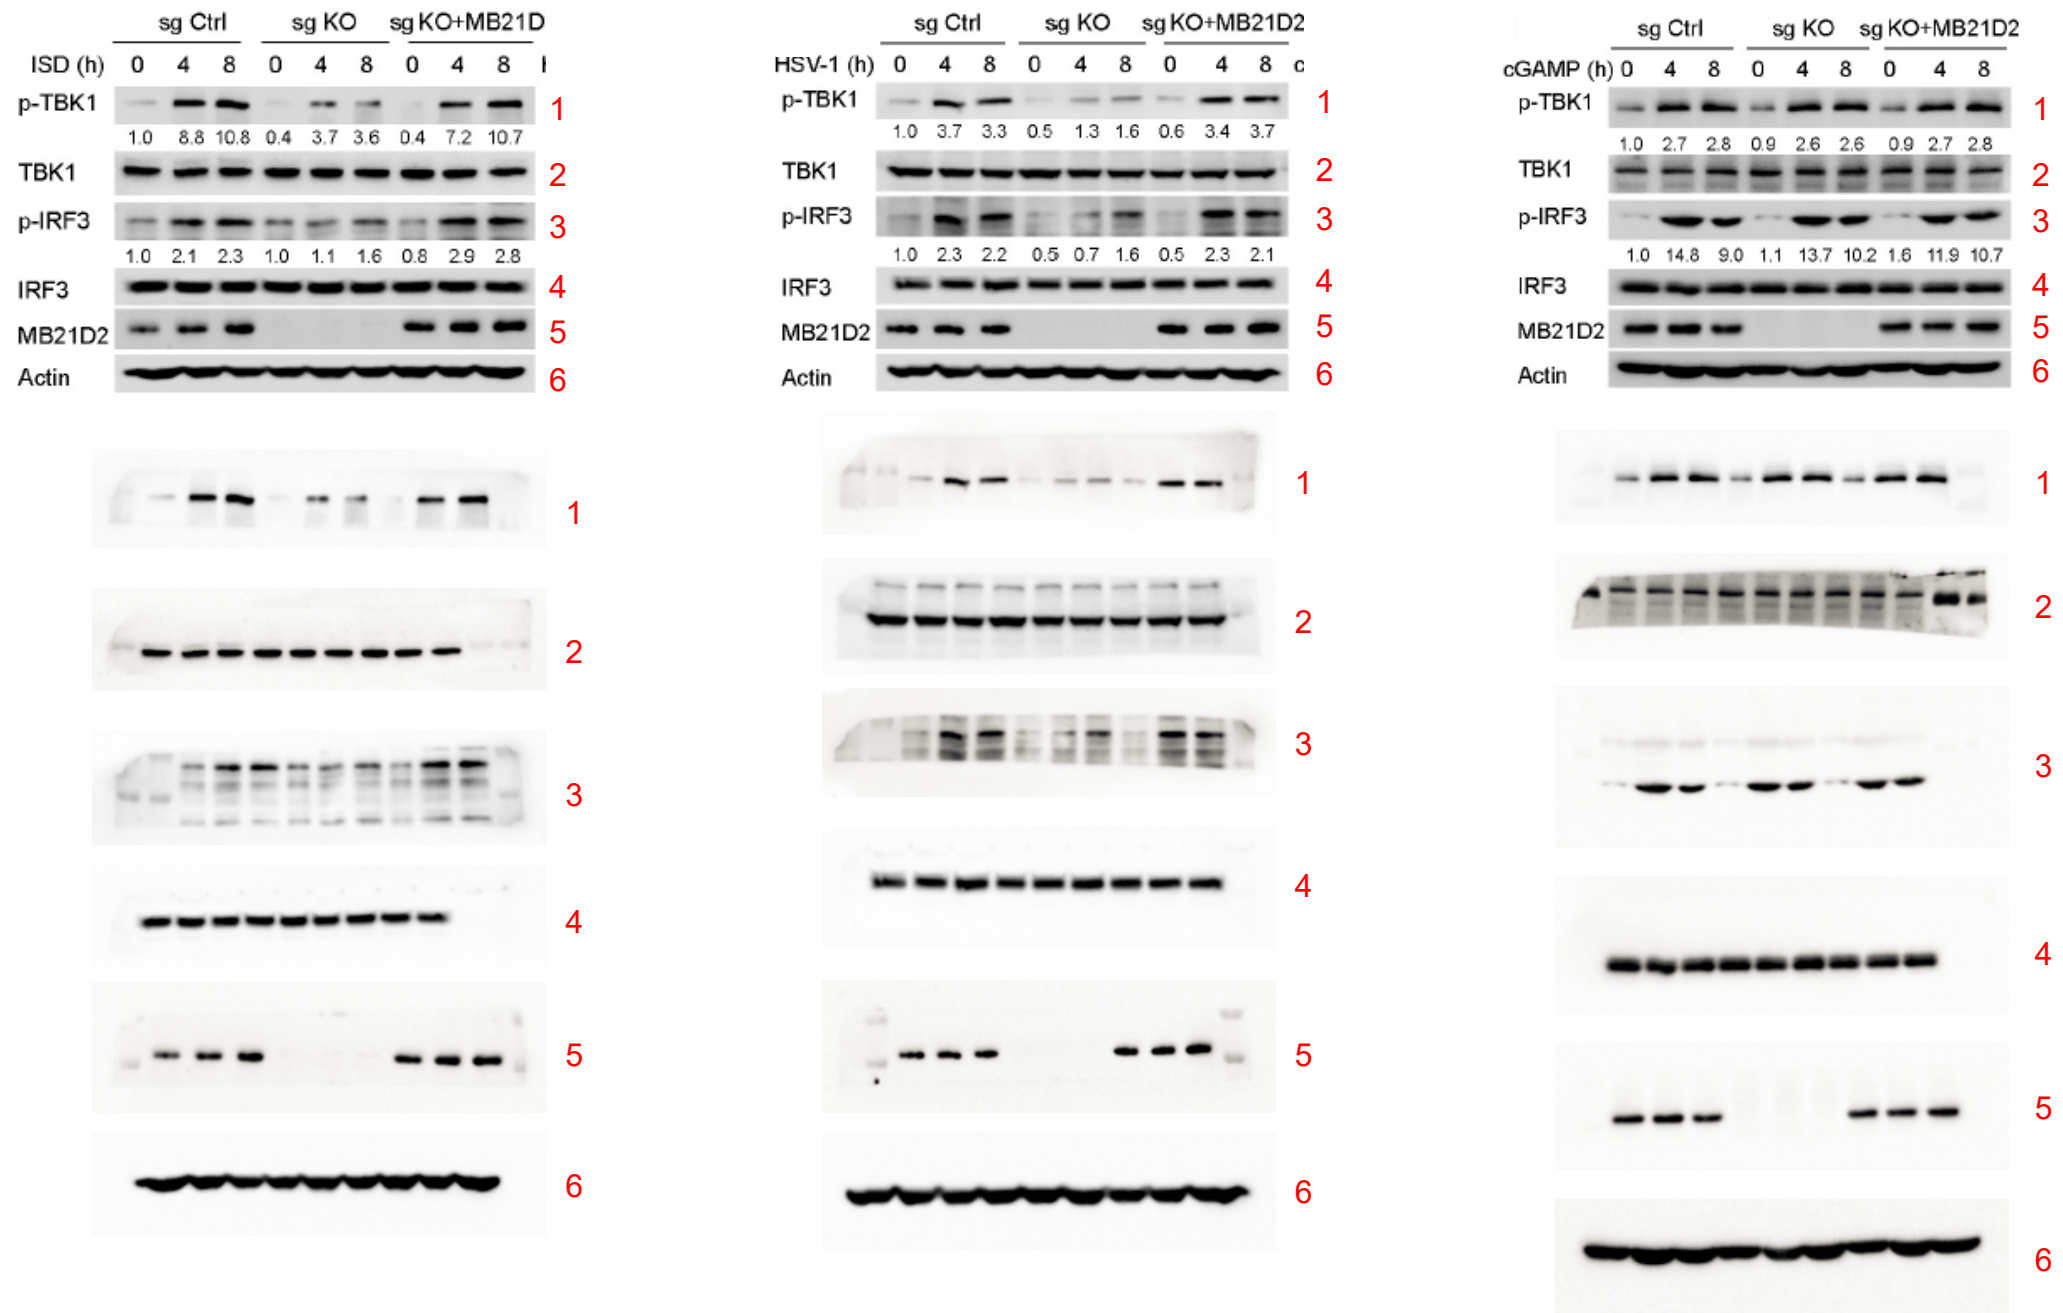

Fig. 3A

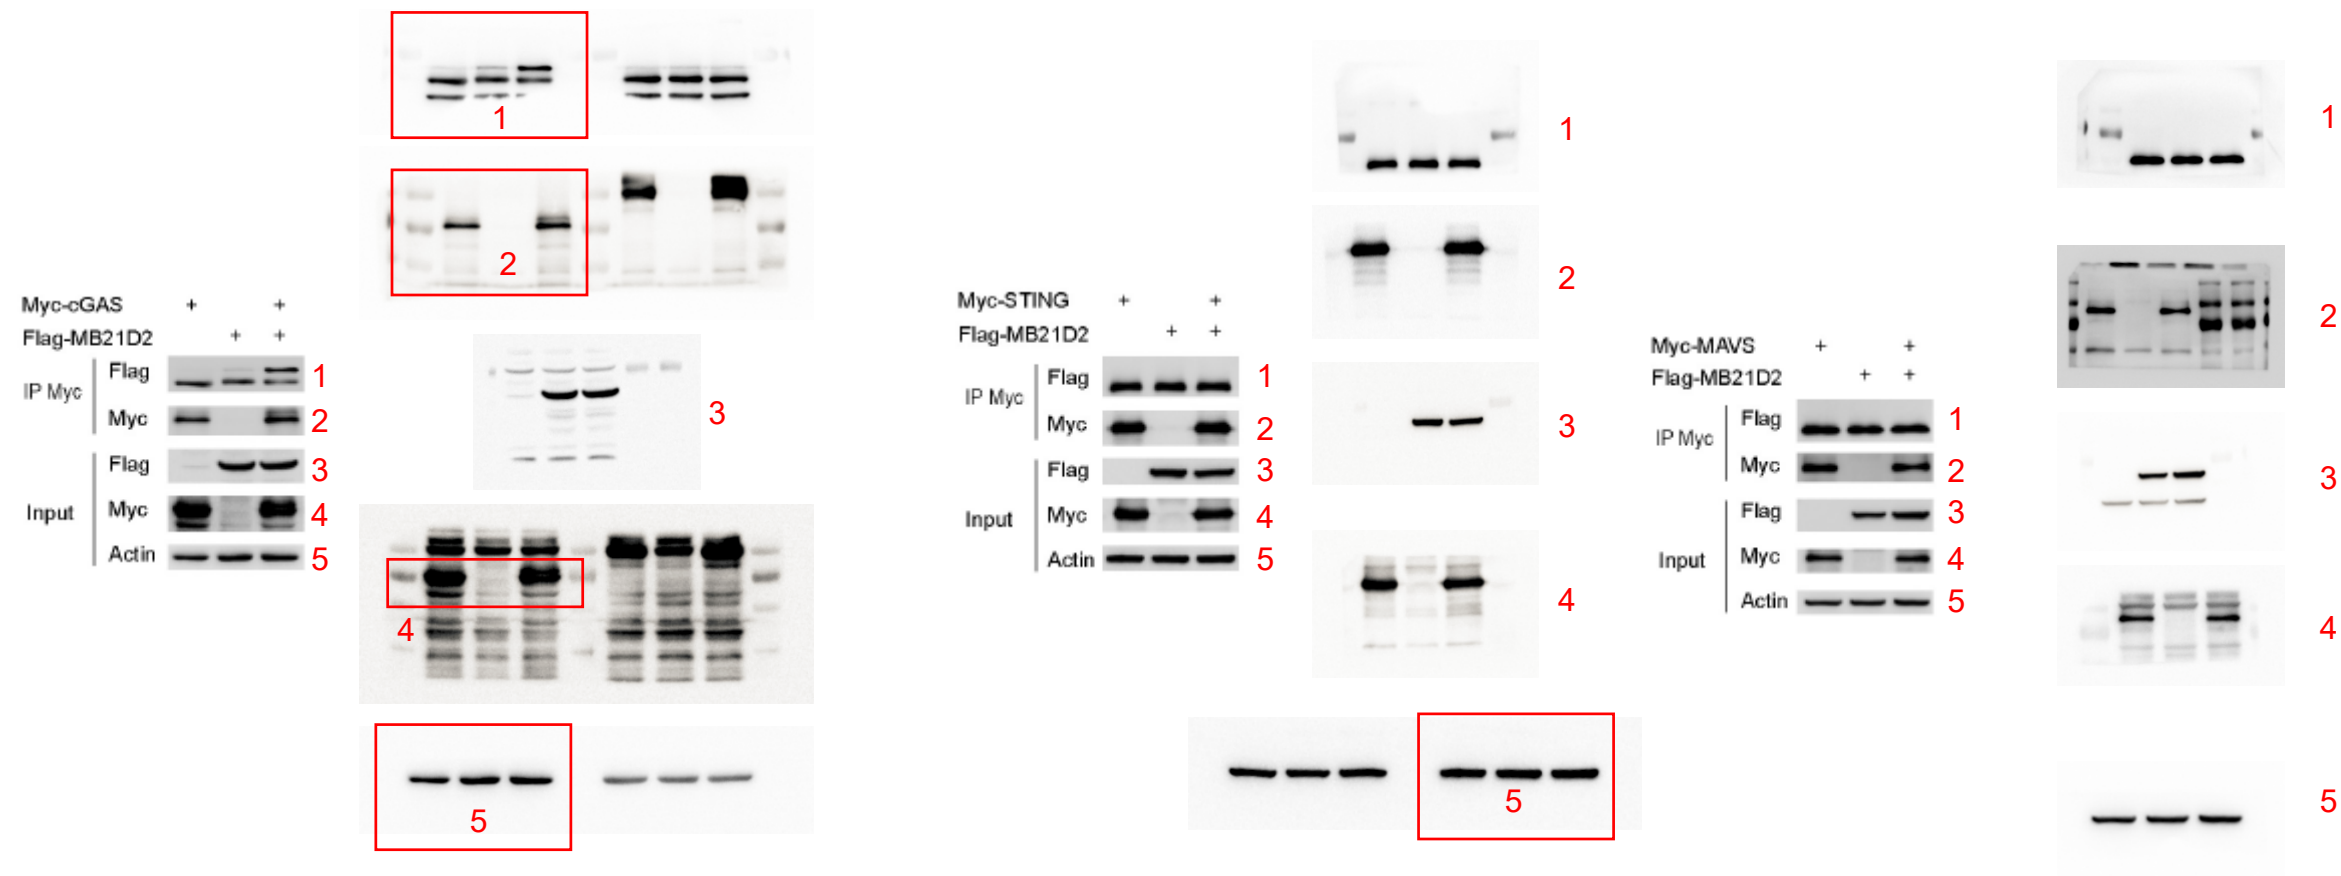

Fig. 3A

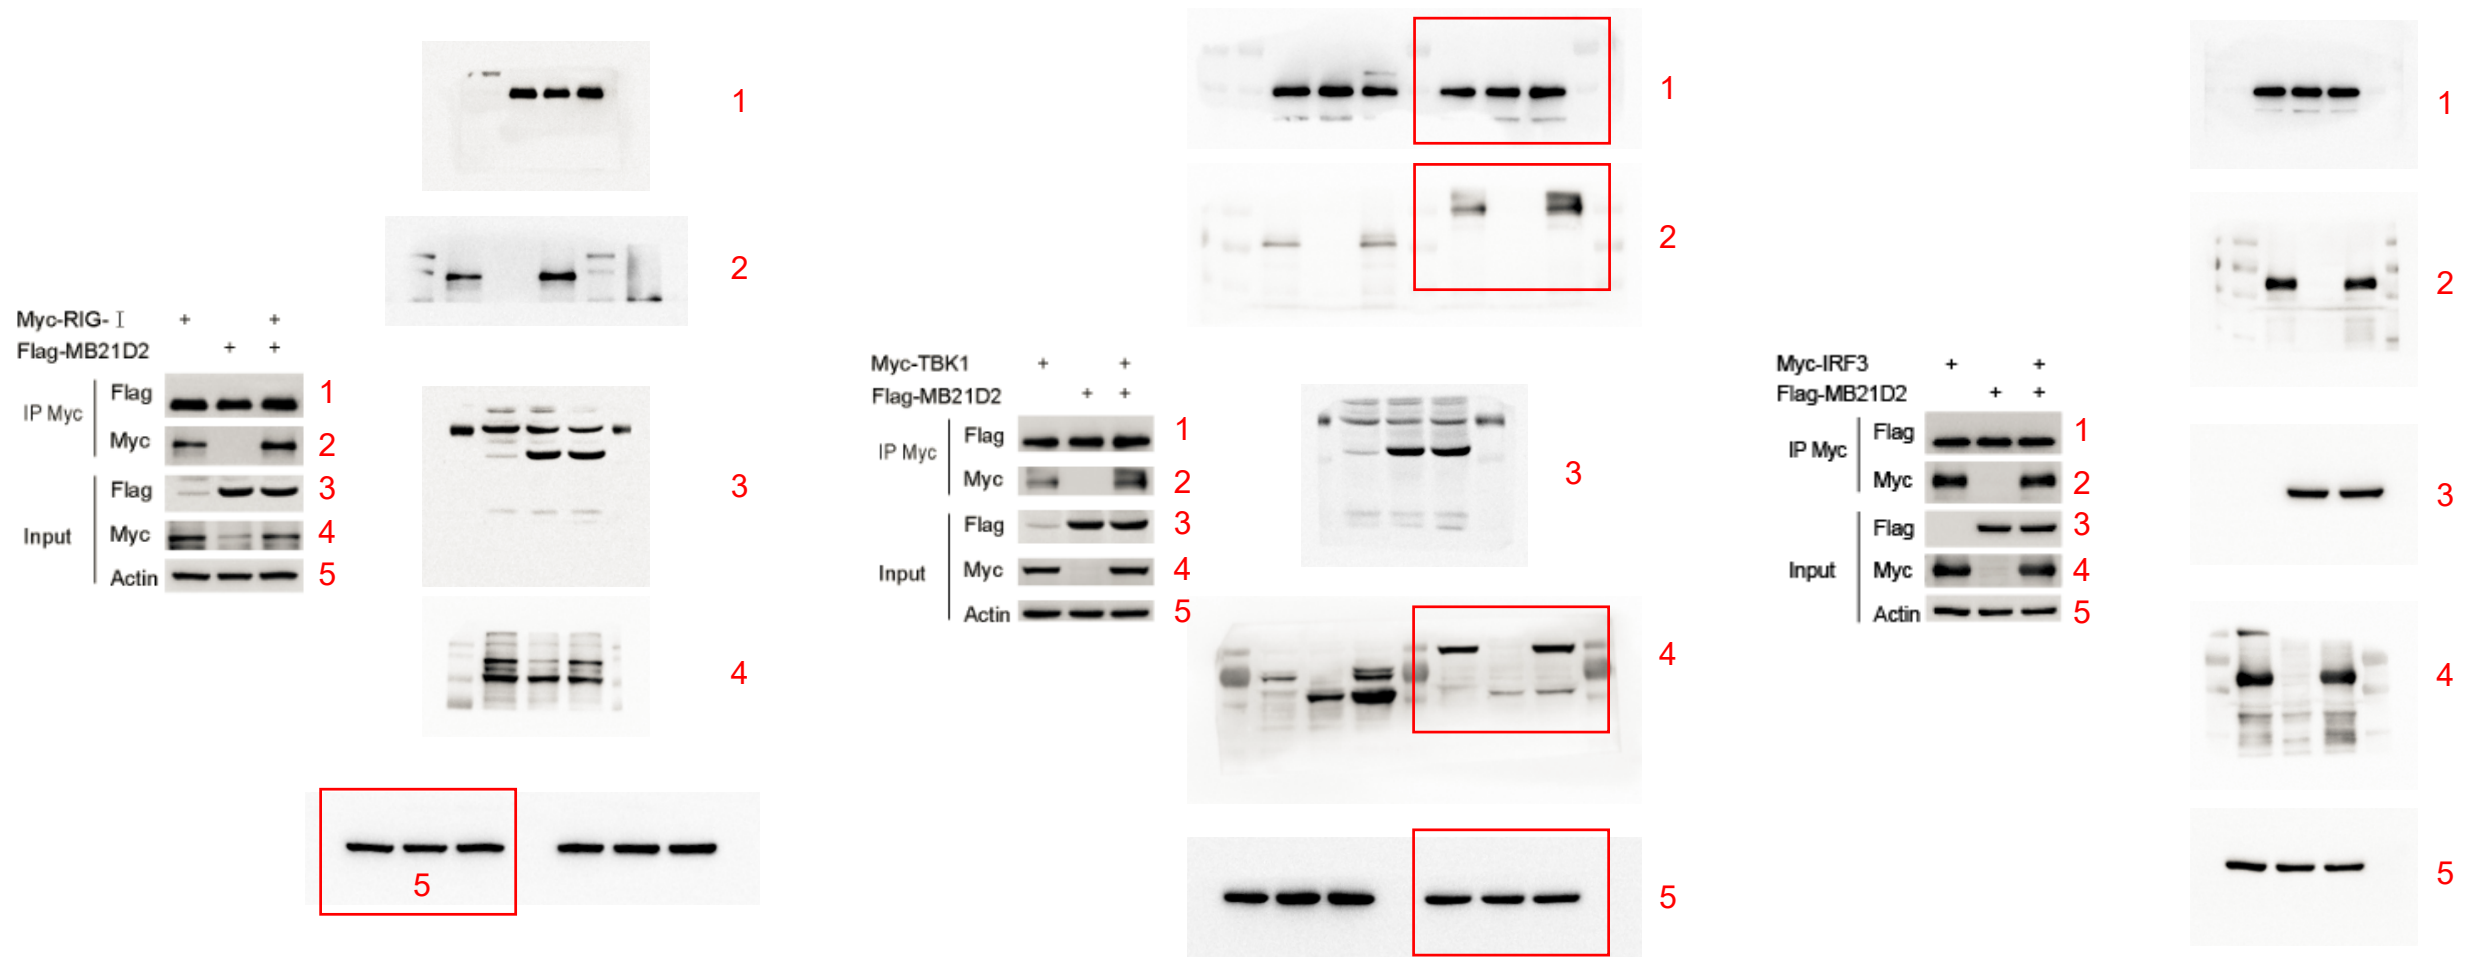

Fig. 3B

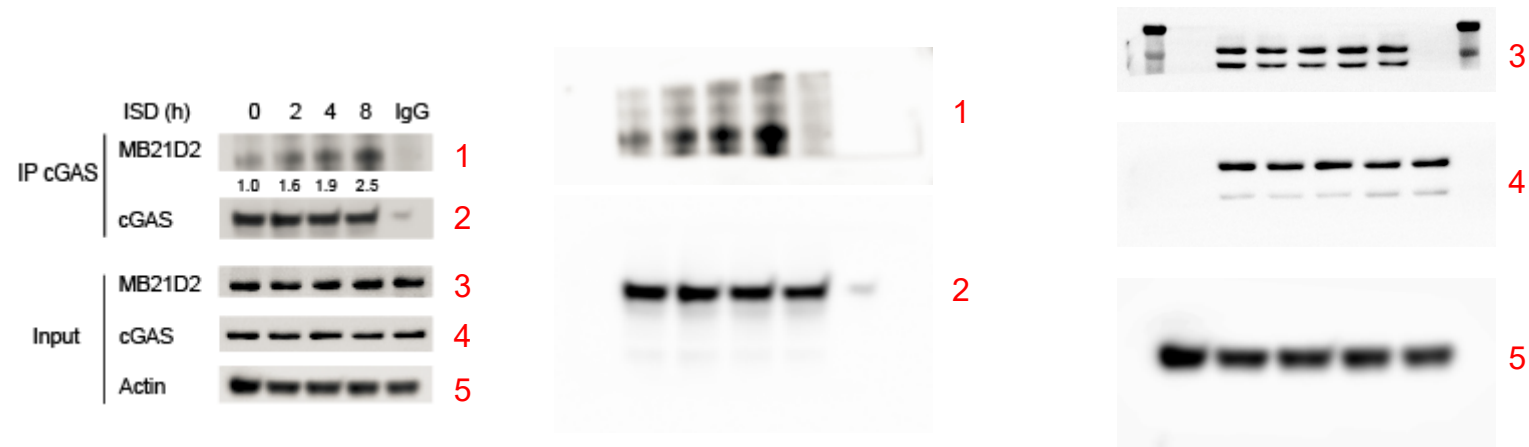

Fig. 3D

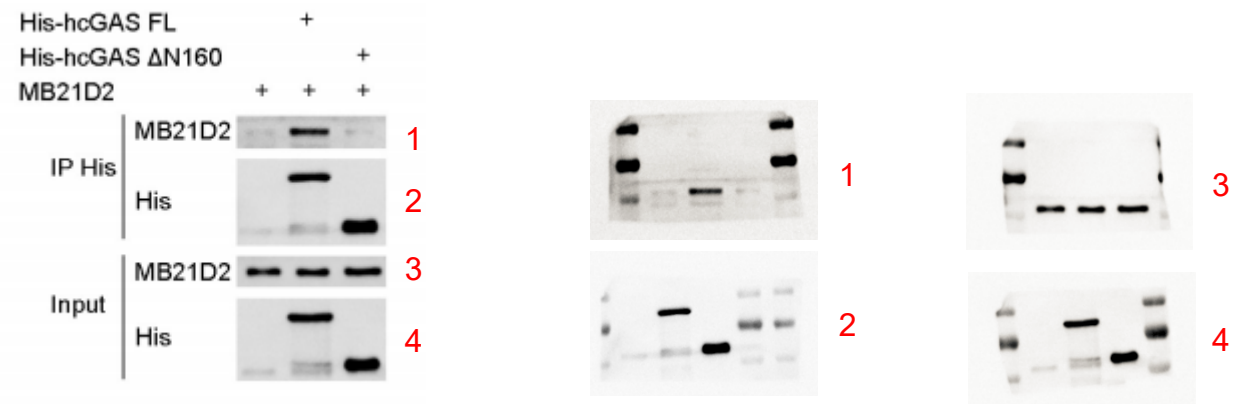

Fig. 3E

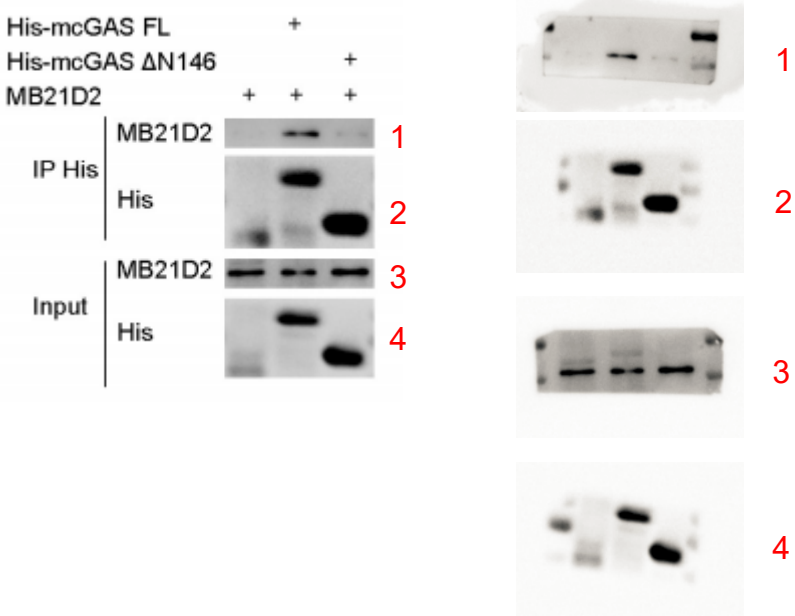

Fig. 3F

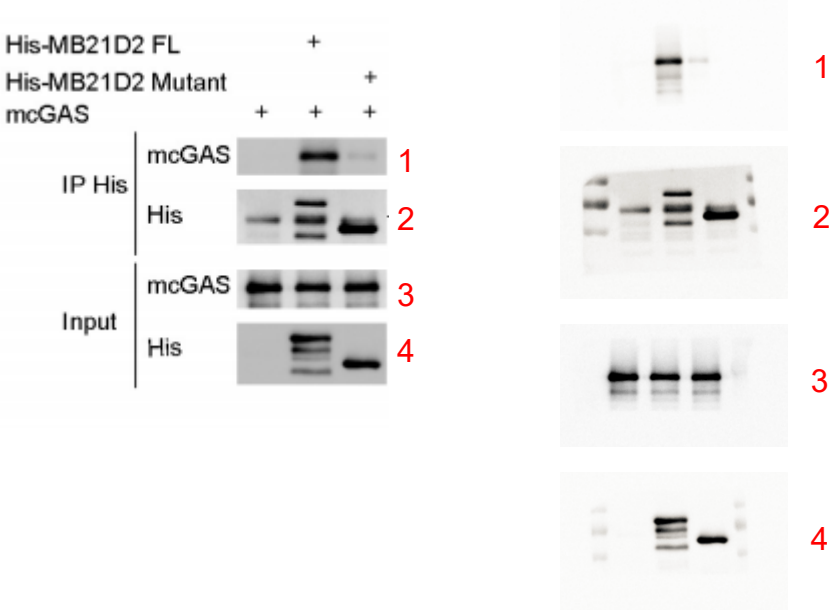



Fig. 4A

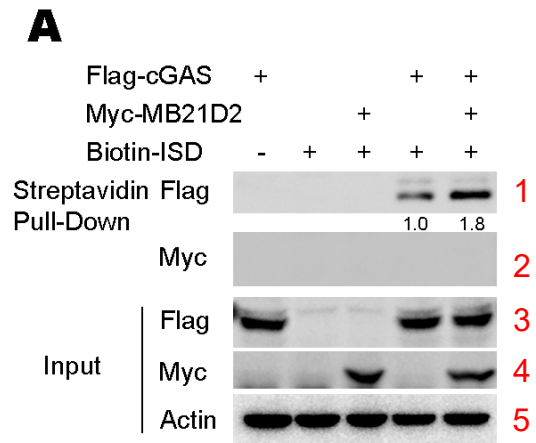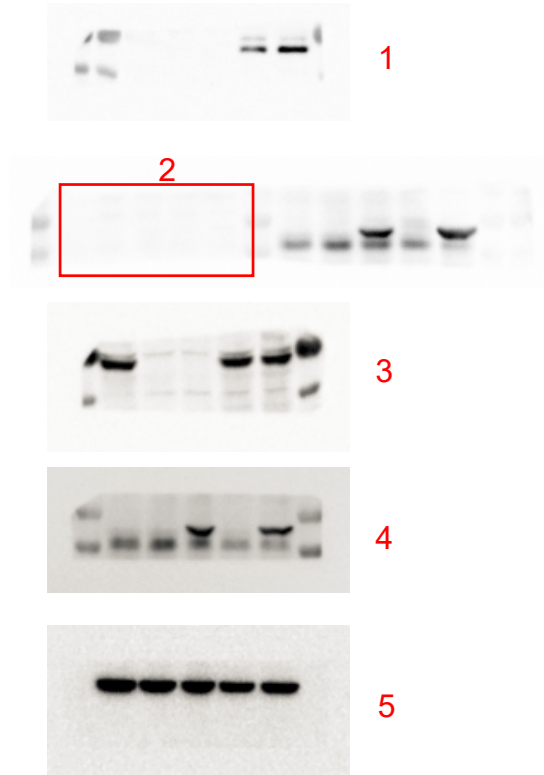

Fig. 4B

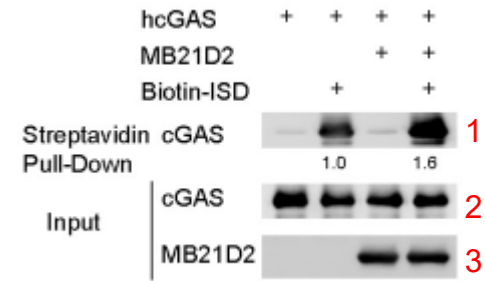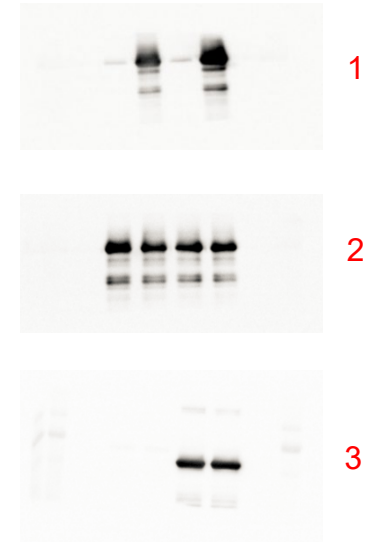

Fig. 4D

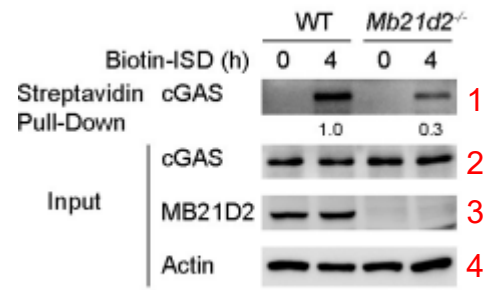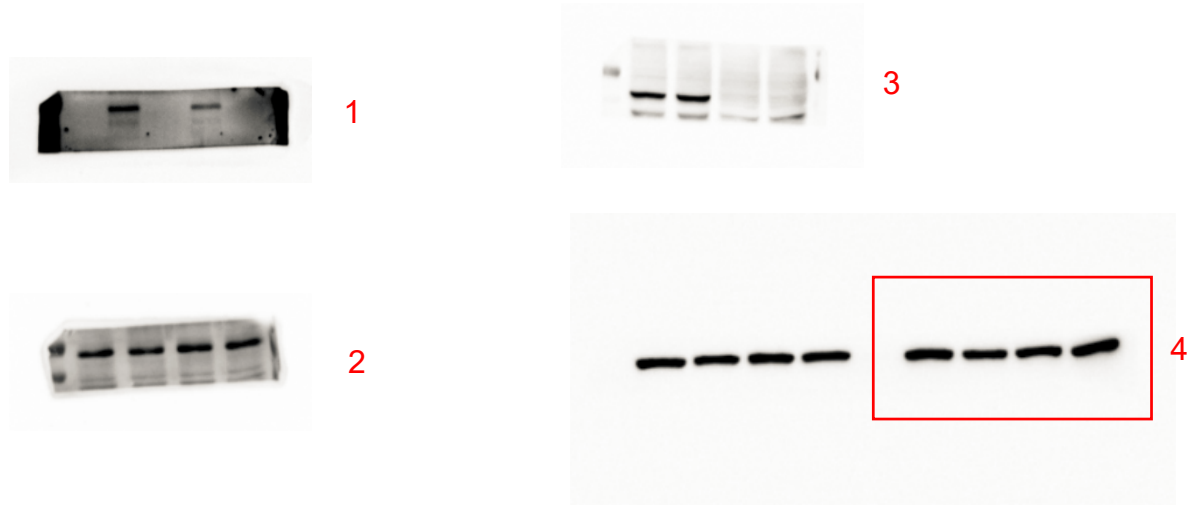

Fig. 4F

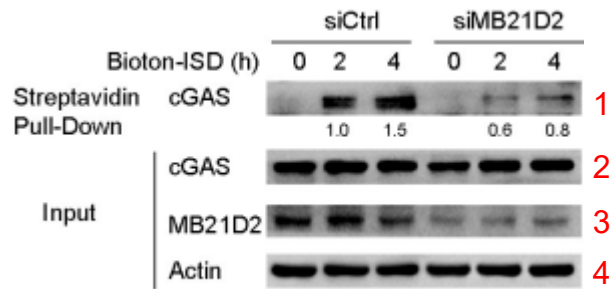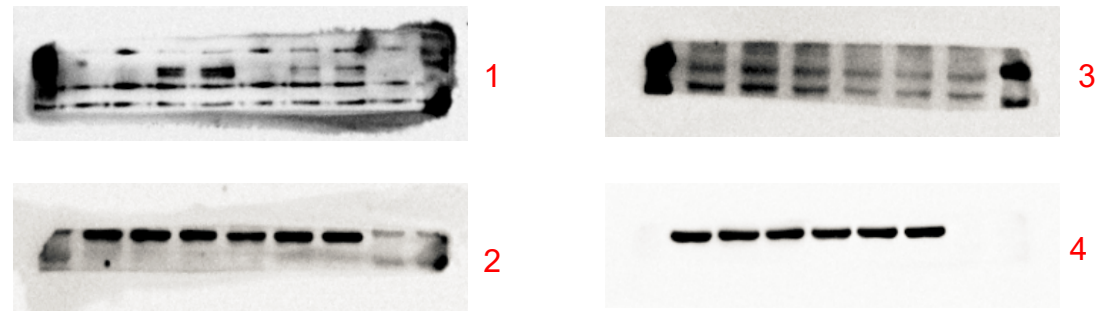

Fig. S1A

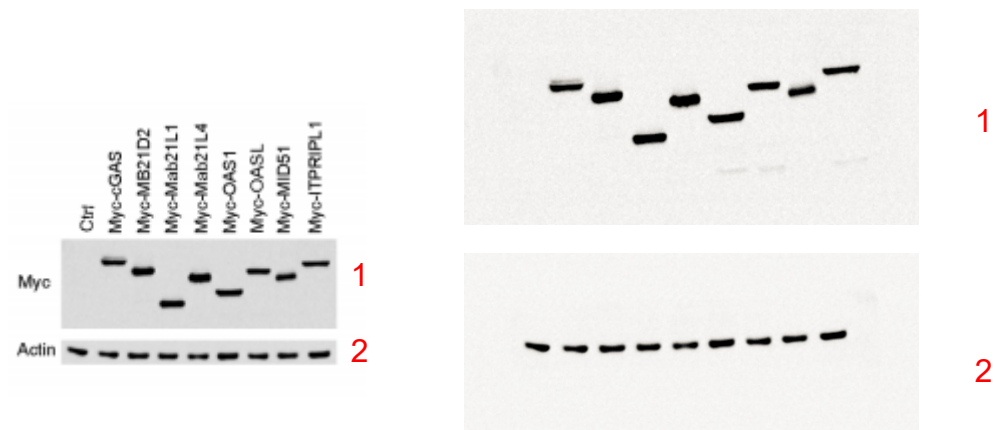

Fig. S1D

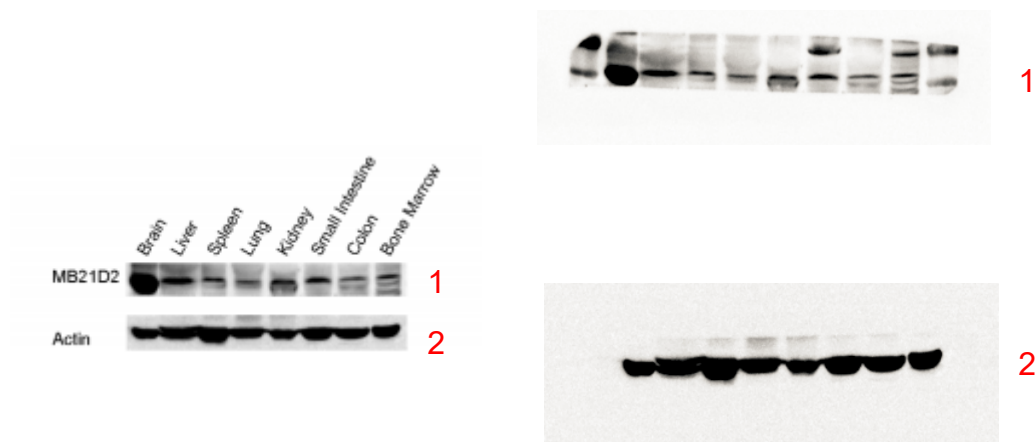

Fig. S2A

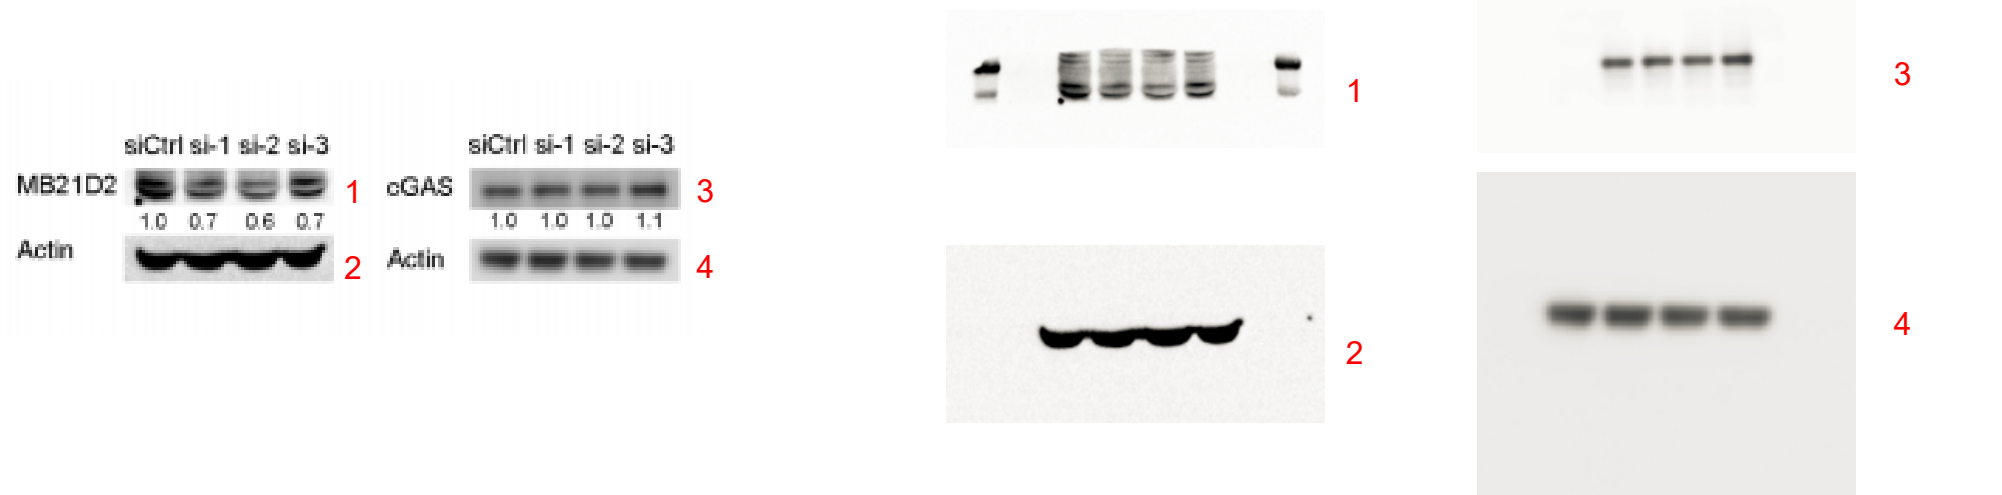

Fig. S3A

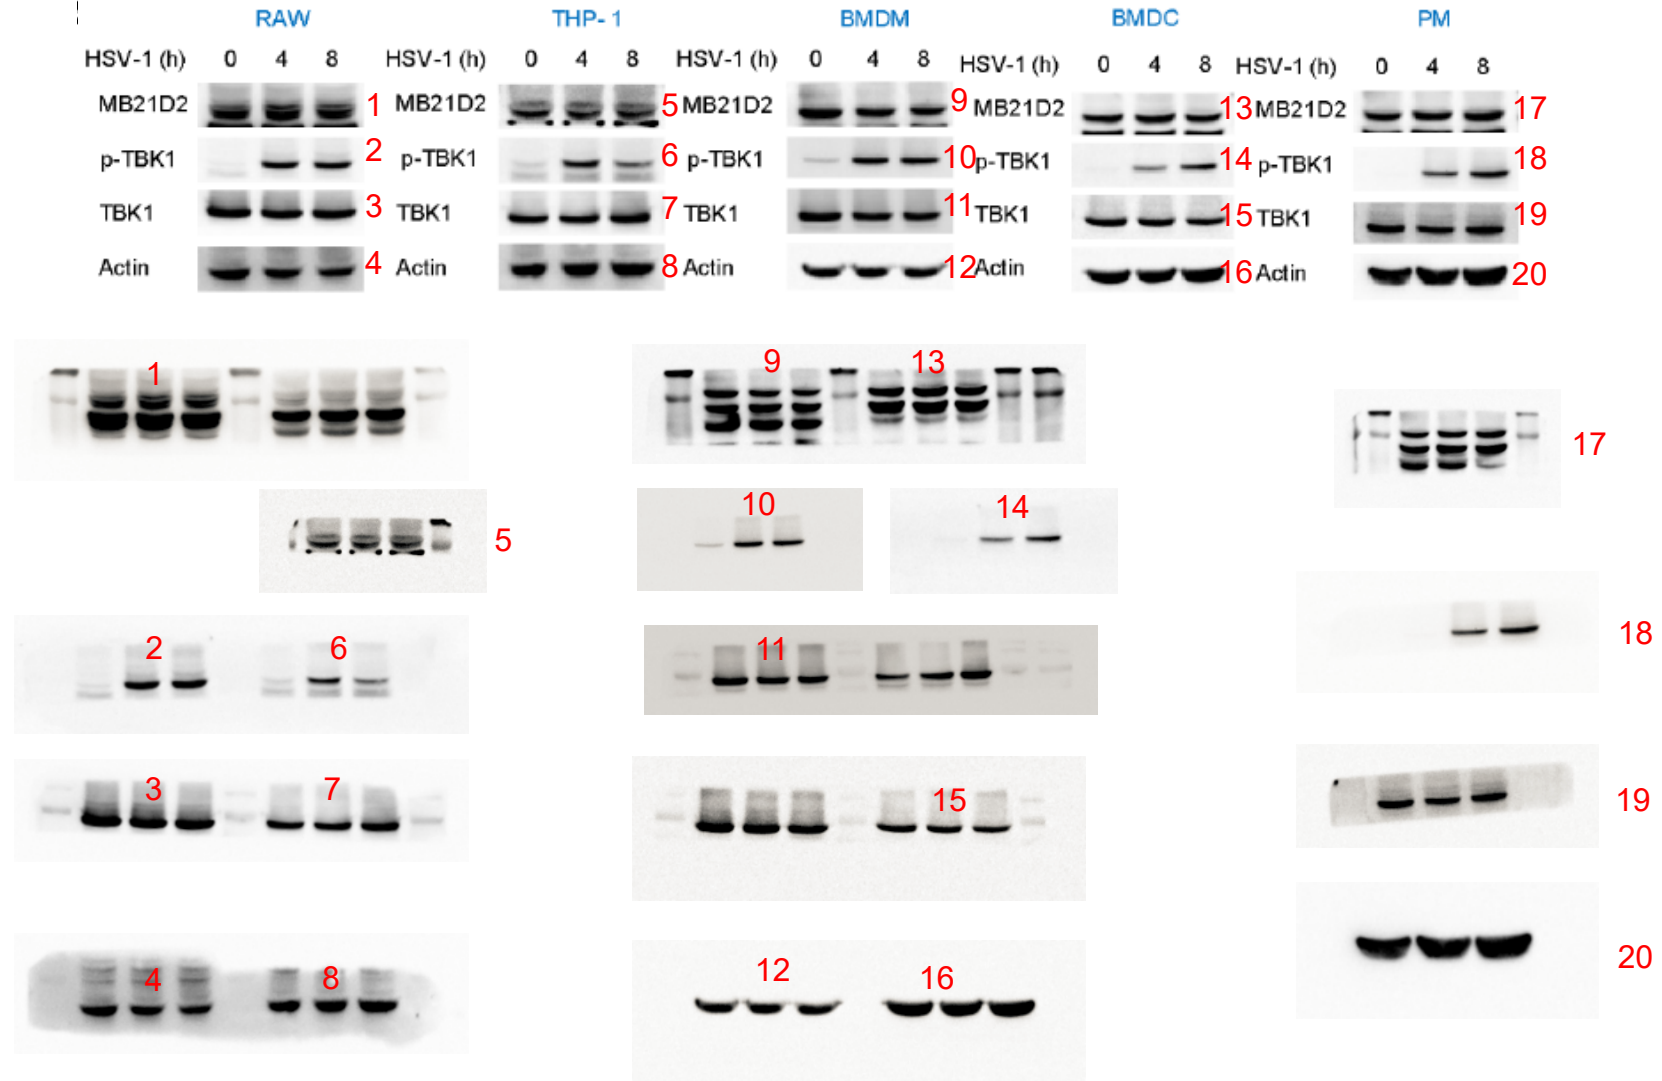

Fig. S3B

ISD

|         | siCtrl |     |     | siMB21D2 |     |     |
|---------|--------|-----|-----|----------|-----|-----|
| ISD (h) | 0      | 4   | 8   | 0        | 4   | 8   |
| p-STING | 1.0    | 7.8 | 7.6 | 0.5      | 3.7 | 2.8 |
| STING   |        |     |     |          |     |     |
| p-TBK1  | 1.0    | 3.3 | 3.7 | 0.8      | 2.6 | 2.1 |
| TBK1    |        |     |     |          |     |     |
| p-IRF3  | 1.0    | 3.3 | 3.5 | 0.9      | 2.1 | 2.3 |
| IRF3    |        |     |     |          |     |     |
| MB21D2  |        |     |     |          |     |     |
| Actin   |        |     |     |          |     |     |

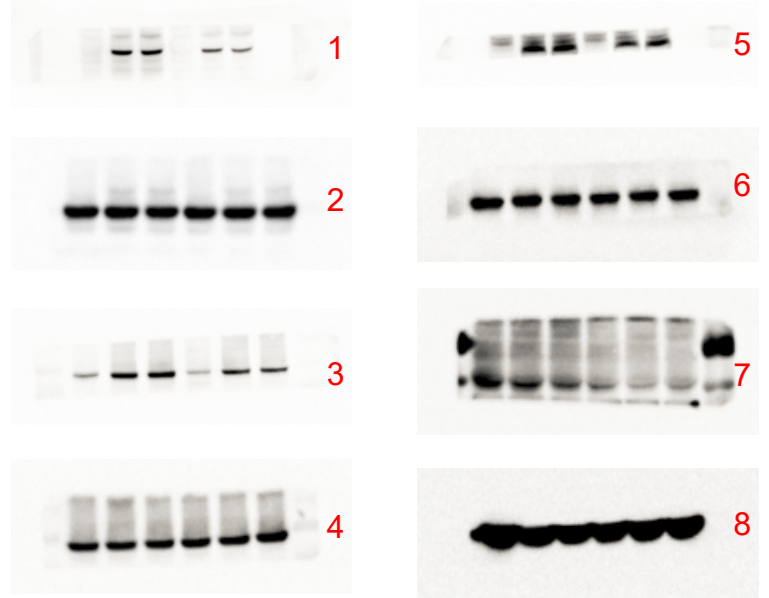

HSV-1

|           | siCtrl |     |     | siMB21D2 |     |     |
|-----------|--------|-----|-----|----------|-----|-----|
| HSV-1 (h) | 0      | 4   | 8   | 0        | 4   | 8   |
| p-STING   | 1.0    | 2.8 | 3.6 | 1.2      | 0.8 | 2.6 |
| STING     |        |     |     |          |     |     |
| p-TBK1    | 1.0    | 1.9 | 2.4 | 1.1      | 1.1 | 1.7 |
| TBK1      |        |     |     |          |     |     |
| p-IRF3    | 1.0    | 1.2 |     | 0.7      | 0.8 |     |
| IRF3      |        |     |     |          |     |     |
| MB21D2    |        |     |     |          |     |     |
| Actin     |        |     |     |          |     |     |

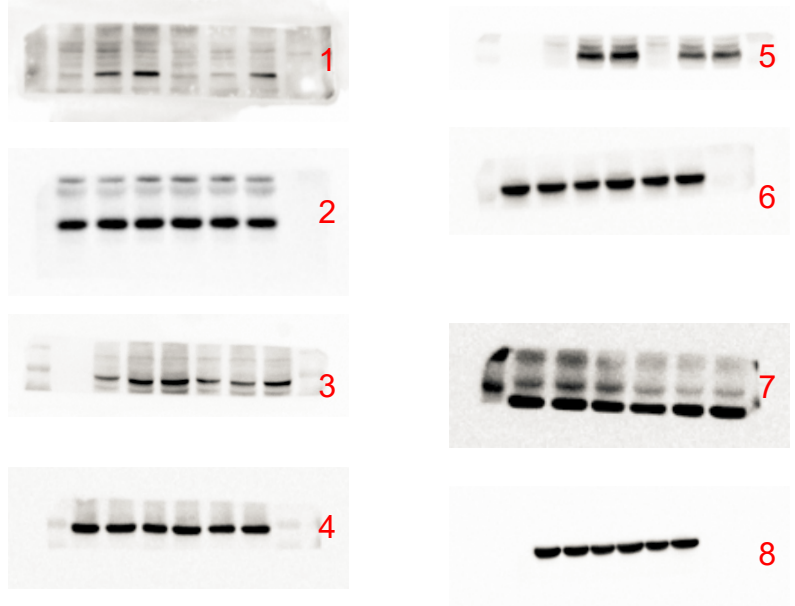

cGAMP

|           | siCtrl |     |     | siMB21D2 |     |     |
|-----------|--------|-----|-----|----------|-----|-----|
| cGAMP (h) | 0      | 4   | 8   | 0        | 4   | 8   |
| p-STING   | 1.0    | 0.6 |     | 0.9      | 0.7 |     |
| STING     |        |     |     |          |     |     |
| p-TBK1    | 1.0    | 3.1 | 3.8 | 0.8      | 2.9 | 3.5 |
| TBK1      |        |     |     |          |     |     |
| p-IRF3    | 1.0    | 0.8 |     | 1.1      | 0.7 |     |
| IRF3      |        |     |     |          |     |     |
| MB21D2    |        |     |     |          |     |     |
| Actin     |        |     |     |          |     |     |

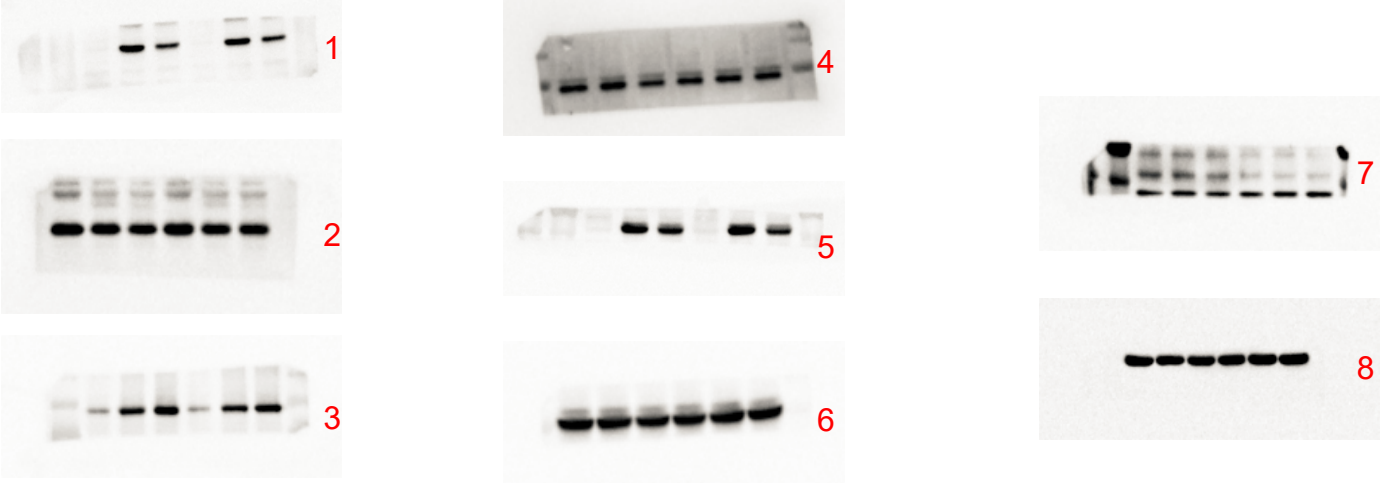

Fig. S3C

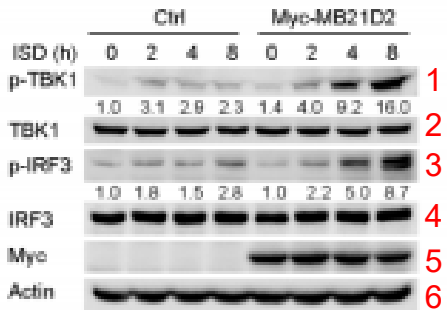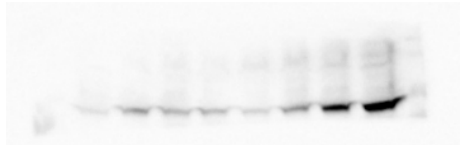

1

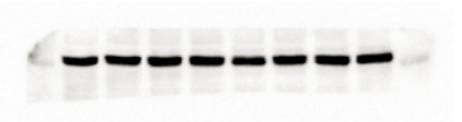

4

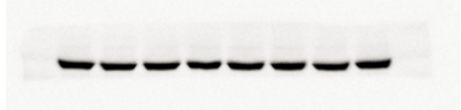

2

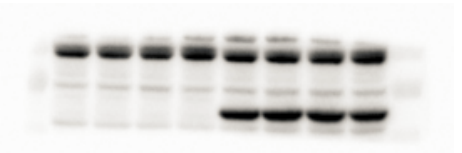

5

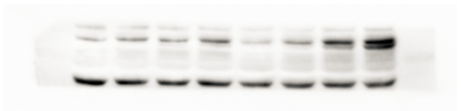

3

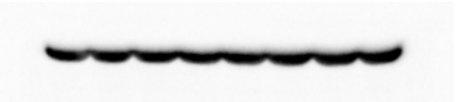

6

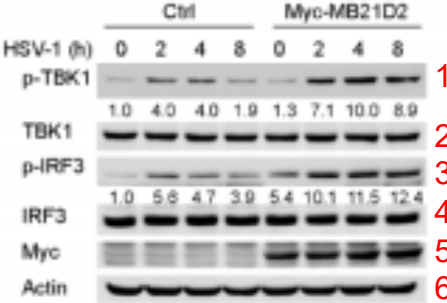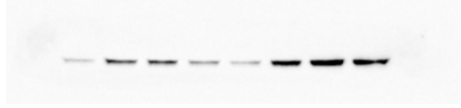

1

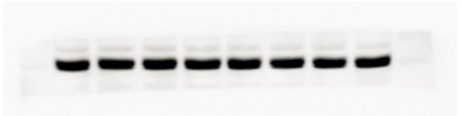

4

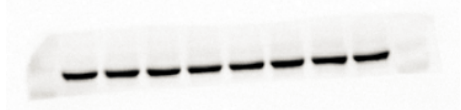

2

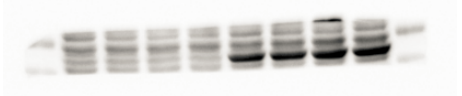

5

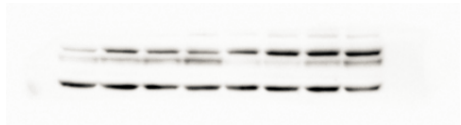

3

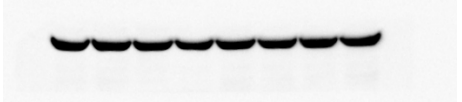

6

Fig. S3D

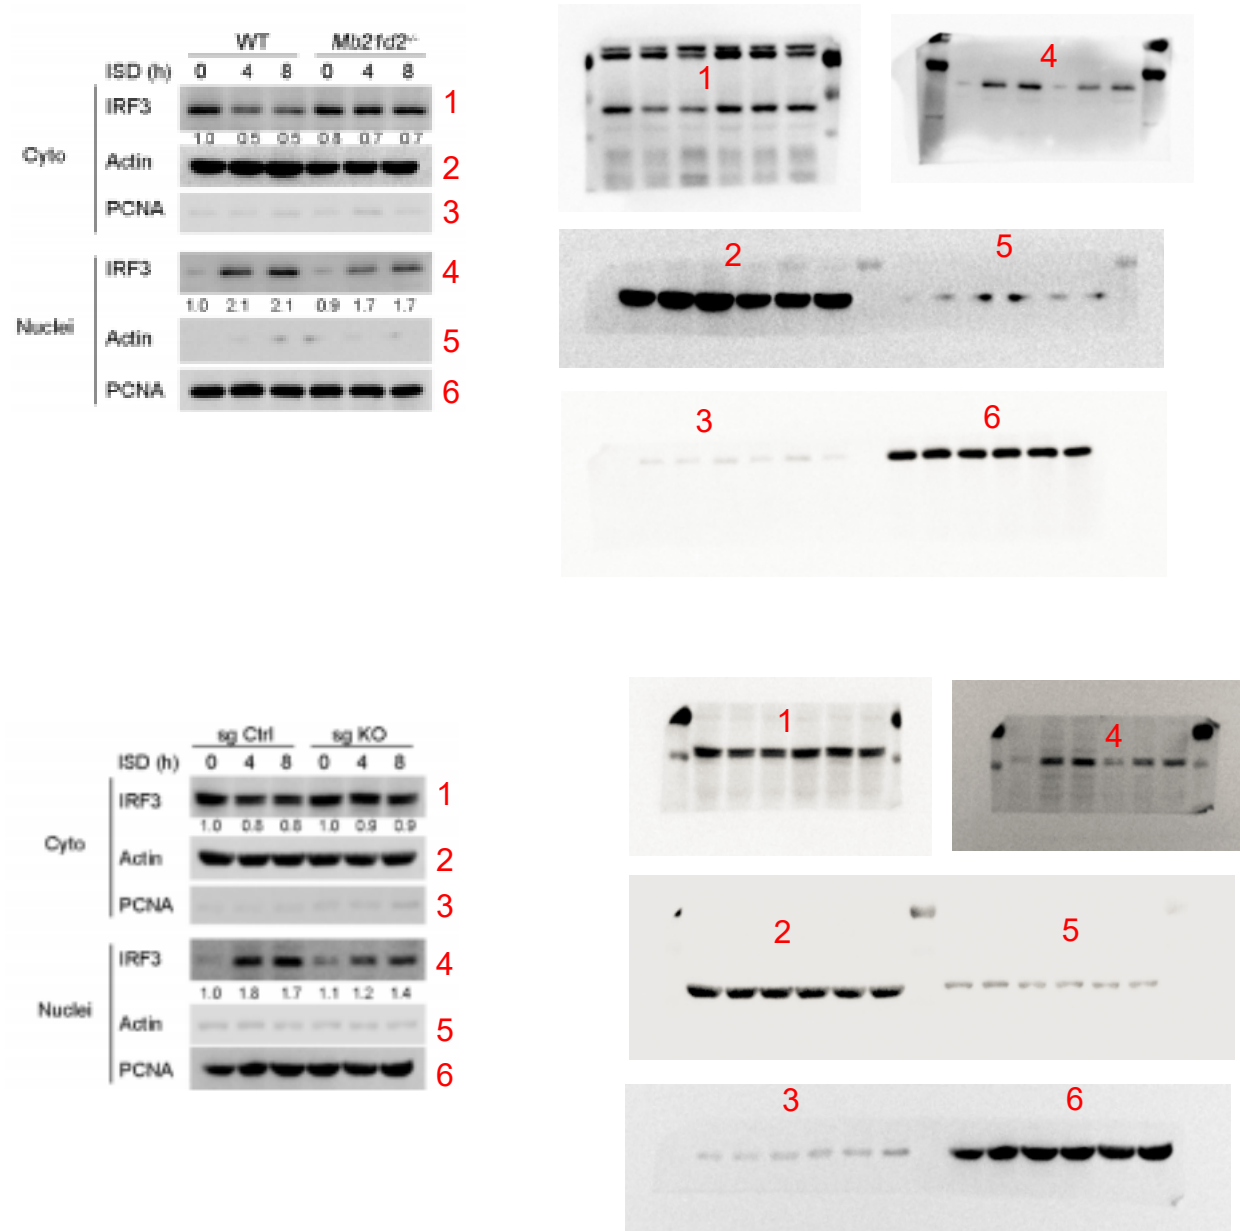

Fig. S5A

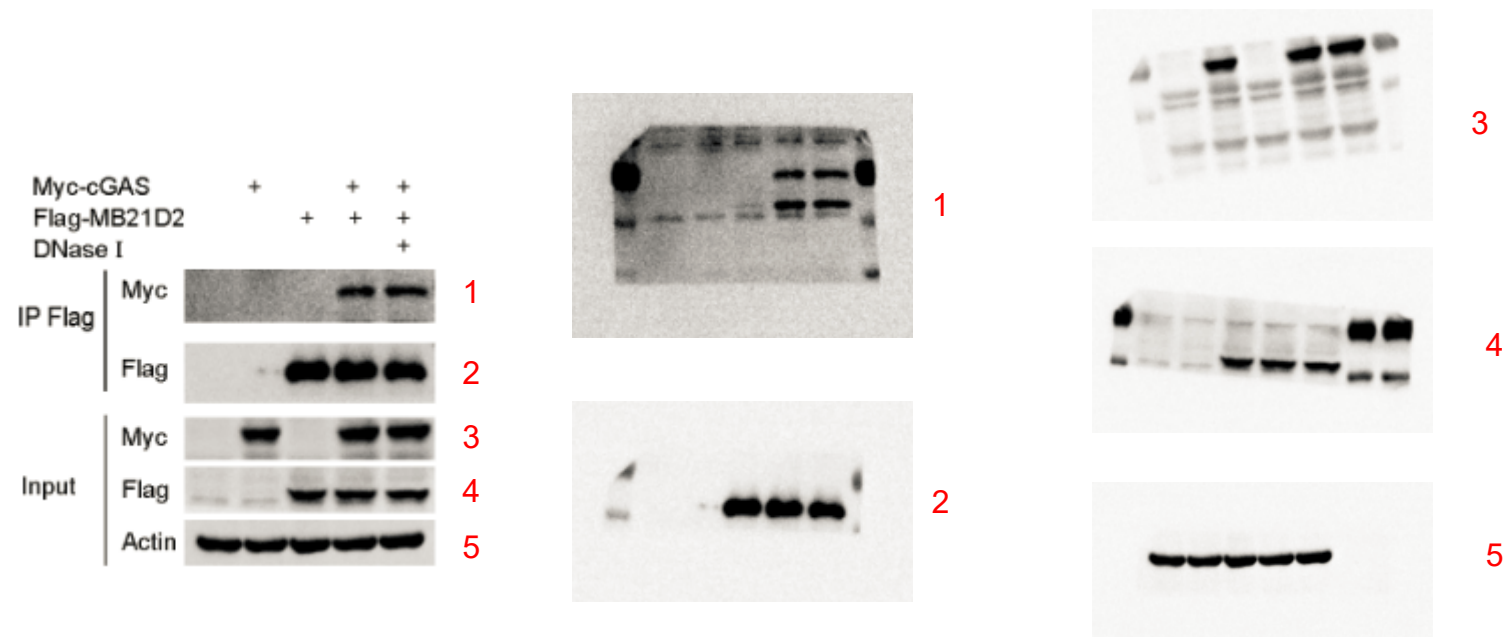

Fig. S5B

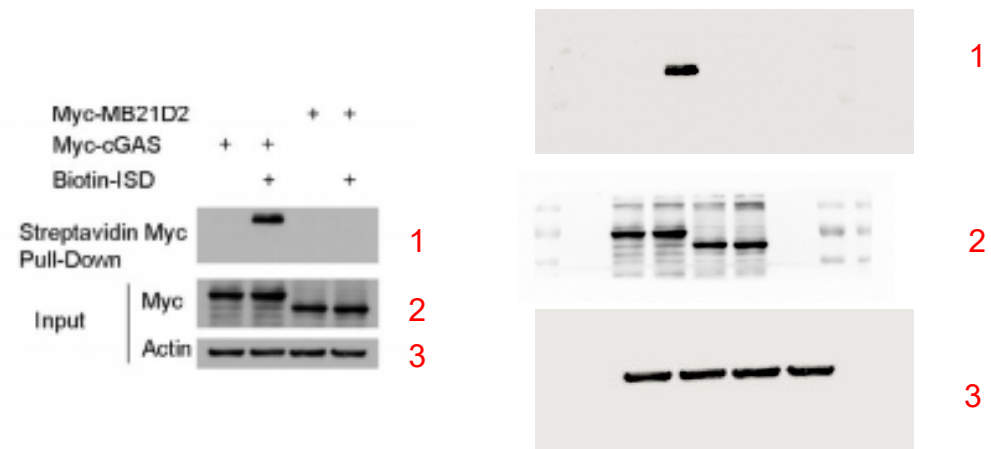



Fig. S7B

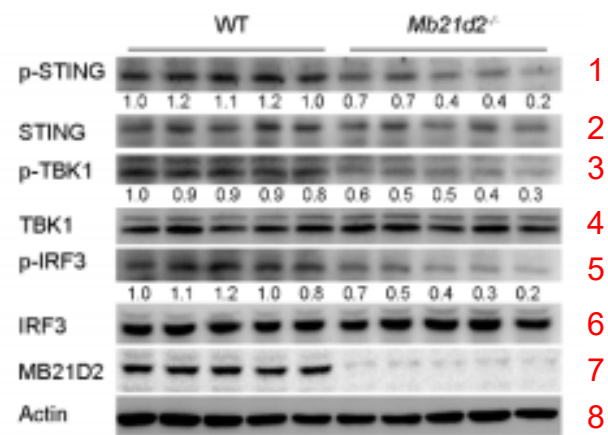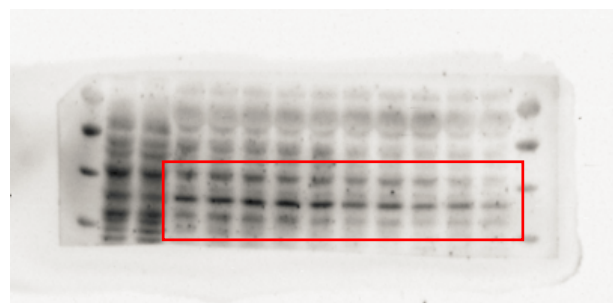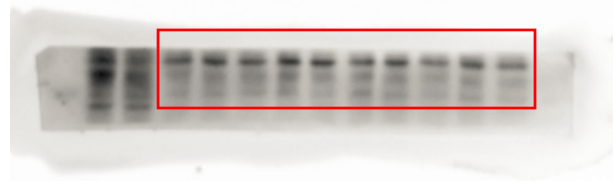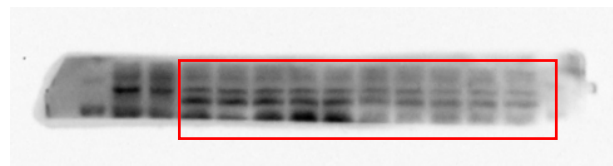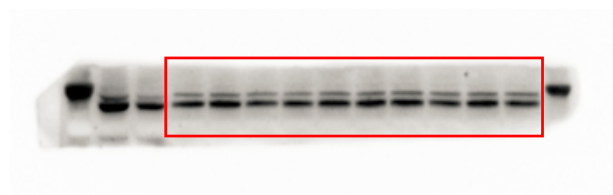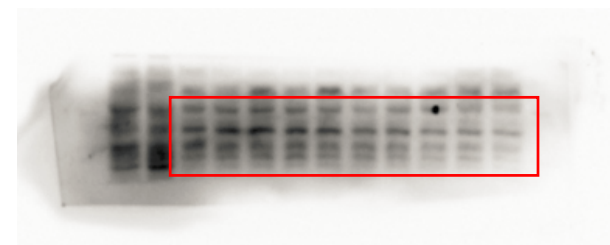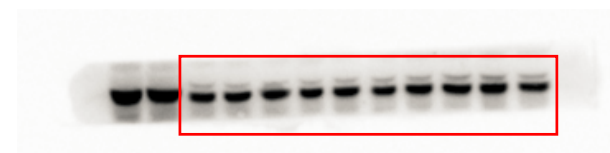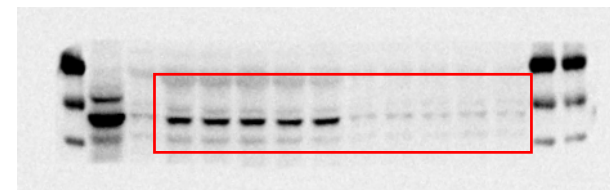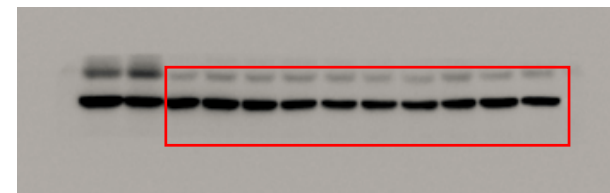

5

6

7

8

Fig. S7C

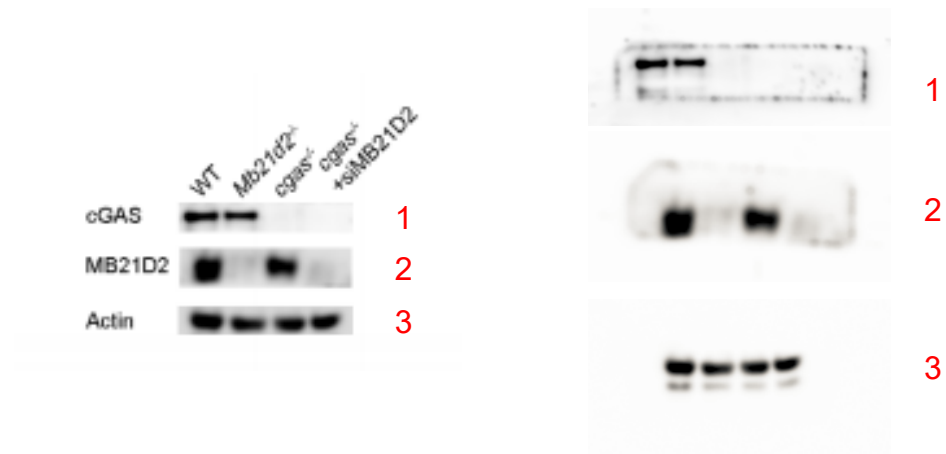

Fig. S7H

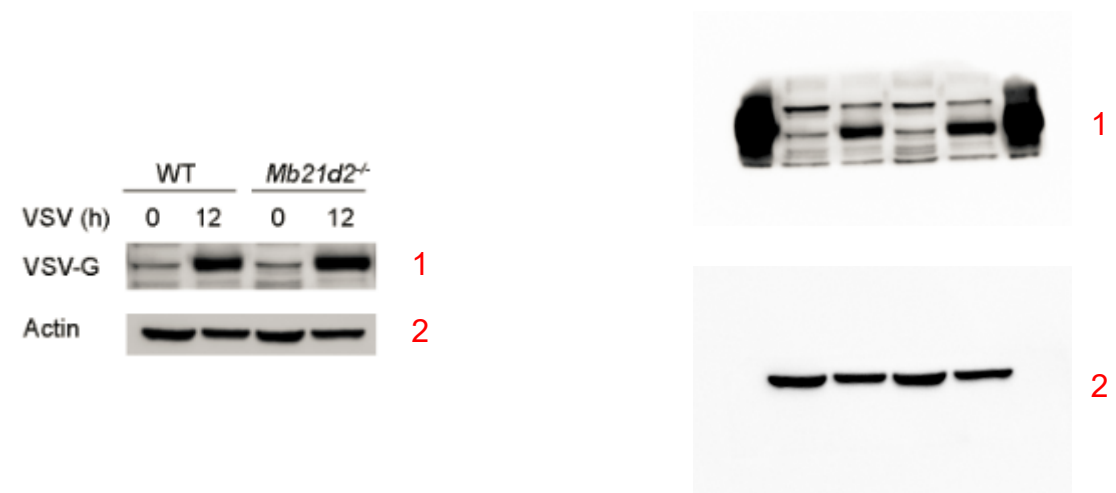

Supplement: 41418_2023_1116_MOESM3_ESM.pdf [file 41418_2023_1116_MOESM3_ESM.pdf]
